# Supplementary material
Source: publisher figshare collection journal article supplement (https://rs.figshare.com/ndownloader/files/8545090)
Supplement: Supplementary file 1 [file 8545090]

## Sheet: Feuil1
Body shape convergence driven by small size optimum in marine angelfishes - Frédérich et al.
Species	TL (mm)	X-rays (n)	12S	16S	CO1	cytB	RAG2	S7
Apolemichthys arcuatus	18	x (7)			KJ148985	KJ148877
Apolemichthys kingi	21				JF492862
Apolemichthys trimaculatus	26	x (5)	AF108548	AY530843	FJ582868	KJ148810	KJ148637
Apolemichthys xanthurus	18	x (3)	AF108549	AY530842	FJ582873	KJ148812	KJ148639
Centropyge acanthops	8	x (4)			HQ561517	KJ148815	KJ148641
Centropyge argi	8	x (3)			FJ582928	KJ148816	KJ148643
Centropyge aurantia	10	x (2)	EF616901	EF616983	KJ148903	KJ148819	KJ148648
Centropyge aurantonota	8	x (1)	AY547300	AY530851	KJ148900	KJ148817	KJ148646
Centropyge bicolor	15	x (5)	FJ616393	AY530845	KJ148908	JQ914309	KJ148651
Centropyge bispinosa	10	x (3)	AF108552	JQ904546	FJ582948	KJ148825	KJ148654
Centropyge boylei	7	x (1)			KJ148911	KJ148827	KJ148656
Centropyge colini	9	x (6)			KJ148915	KJ148831	KJ148659
Centropyge eibli	15	x (2)	AF108553	KJ551868	FJ582959	JQ914327	JQ914418	JQ914484
Centropyge ferrugata	10	x (1)	AF108554		FJ582961	KJ148834	KJ148664
Centropyge fisheri	6	x (1)			KJ148923	KJ148836	KJ148666
Centropyge flavicauda	8	x (2)	AF108555		KJ148930	KJ148841	KJ148673
Centropyge flavipectoralis	10	x (3)			KJ148927	KJ148839	KJ148670
Centropyge flavissima	14	x (4)	AF108556	AY530841	KJ148934	JQ914310	JQ914401	JQ914458
Centropyge heraldi	10	x (10)		KJ551909	FJ582965	KJ148843	KJ148680
Centropyge interrupta	15	x (4)			KJ148945	KJ148847	KJ148684
Centropyge joculator	9	x (1)			KJ148946	KJ148848	KJ148685
Centropyge loricula	15	x (5)	AF108557	AY530856	FJ582974	DQ489742	KJ148688
Centropyge multicolor	9	x (6)			FJ582977	KJ148853
Centropyge multifasciata	12	x (6)	AF108558	AY530853	KJ148951	KJ148854	KJ148689
Centropyge multispinis	14		AF108559		JF493081	KJ148857	KJ148692
Centropyge nahackyi	9	x (2)			KJ148957	KJ148858	KJ148694
Centropyge narcosis	7	x (2)			KJ148963	KJ148864	KJ148698
Centropyge nox	10	x (2)	AF108560	JQ904556	FJ582980	KJ148863	KJ148696
Centropyge potteri	10	x (6)	AF108561	AY530863	FJ582984	KJ148866	KJ148699
Centropyge resplendens	6				KJ148966	KJ148868	KJ148701
Centropyge shepardi	9	x (4)			KJ148971	KJ148872	KJ148705
Centropyge tibicen	15	x (2)	AF108562	JQ904559	FJ582986	KJ148874	KJ148709
Centropyge venusta	12	x (3)		AY530862	KJ148975	KJ148875	KJ148710
Centropyge vroliki	12	x (9)	AF108564	KJ551883	FJ582996	JQ914332	JQ914419	JQ914491
Chaetodontoplus caeruleopunctatus	18		AF108565		FJ583090	AF108640
Chaetodontoplus duboulayi	28	x (1)	AF108566	AY530846		AF108641		KC820929
Chaetodontoplus melanosoma	20	x (2)	AF108567		FJ583093	AF108642
Chaetodontoplus meredithi	25		AF108568			AF108643
Chaetodontoplus mesoleucus	18	x (4)	AY530823	AY530847	FJ583094	KJ148846	KJ148683	KC820930
Chaetodontoplus septentrionalis	22	x (3)			FJ583095	14545-15685
Genicanthus bellus	18	x (2)			JQ431750
Genicanthus caudovittatus	20	x (1)			JF493511
Genicanthus lamarck	25		AF108569	AY530849	FJ583415	KJ148878	KJ148712
Genicanthus melanospilos	18		AF108570	AY530850	FJ583424	KJ148880	KJ148714
Genicanthus personatus	21	x (2)			KJ148990	KJ148882	KJ148716
Genicanthus watanabei	20	x (3)			FJ583427	KJ148884	KJ148718
Holacanthus africanus	35		KC845393	KC845331		KC845351		KC845372
Holacanthus bermudensis	45	x (2)	AY530835	AY530867		KC845358	EF617149	KC845379
Holacanthus ciliaris	45	x (1)	KC845395	AY530861	FJ583558	KC845354		KC845374
Holacanthus clarionensis	45		KC845390	KC845327		KC845348		KC845369
Holacanthus limbaughi	20		KC845391	KC845328		KC845349		KC845370
Holacanthus passer	25	x (6)	AY530828	AY530857		KC845350		KC845371
Holacanthus tricolor	36	x (1)	AY530833	AY530864	FJ583563	KC845357		KC845378
Pomacanthus annularis	45	x (3)	AF108571	KC820905	FJ583875	AF108646		KC820915
Pomacanthus arcuatus	60	x (3)	AY530836	AY530868	JQ840972		EF617147	KC820916
Pomacanthus asfur	40	x (4)	AY530826	AY530854				KC820917
Pomacanthus chrysurus	35	x (1)	KC820897	KC820907				KC820918
Pomacanthus imperator	43	x (9)	AF108572	KC820908	FJ583877	FJ424064		KC820919
Pomacanthus maculosus	53	x (3)	JF826959	KC820909	HQ149905	JN604372		KC820920
Pomacanthus navarchus	28	x (3)	AF108573	KC820910	FJ583883	AF108648		KC820921
Pomacanthus paru	41	x (3)	AY530824	AY530852	FJ583885			KC820922
Pomacanthus rhomboïdes	46	x (1)	KC820901	KC820911	GU805098	FJ167723		KC820923
Pomacanthus semicirculatus	43	x (5)	AF108574	AY530844	FJ583886	AF108649		KC820924
Pomacanthus sexstriatus	46	x (2)	AF108575	AY530858	KJ148993	KJ148886	KJ148719	FJ167851
Pomacanthus xanthometopon	38	x (1)	AF108576	KC820912		AF108651		KC820926
Pomacanthus zonipectus	46	x (3)	AY530840	AY530874	EU547238	KC845344	KJ148722	KC820927
Pygoplites diacanthus	28	x (2)	AF108577	AY530873	FJ584045	KC188041	KJ148721	KC820928
Out_group
Platax orbicularis			AY279562	AY279665	FJ583856	FJ167721	AY279871	FJ167848
Acanthurus nigricans			AY057239	AY057287	HM034185	KM455498		EF648230
Naso lituratus			AF055603	AF055624	KF714981	AB276964		EF648256
Zanclus cornutus			EF616898	EF616980	JQ350421	14408-15548	EF617145
Luvarus imperialis			AF055601	AY264587	KC623653	14381-15521
Chaetodon argentatus			AF108505		FJ583018	AF108580		FJ167794
Chaetodon lunulatus			AJ748307	JF457293	KJ967961	JQ012141		FJ167810
Chaetodon auriga			AF108507	EF616943	KF489522	KC187944	EF617108
